# Supplementary material for: Carbon dioxide sequestration by mineral carbonation via iron complexation using bipyridine chelating ligands
Source: Royal Society of Chemistry journal article supplement (doi:10.1039/d3dt00563a), 2023-01-01
Supplement: d3dt00563a1.pdf [file d3dt00563a1.pdf]

1            **Electronic Supplementary Information**

2    **Carbon dioxide sequestration by mineral carbonation via iron complexation**  
3    **using bipyridine chelating ligands**

4    Javier F. Reynes<sup>a\*</sup>, Guy Mercier<sup>b</sup>, Jean-François Blais<sup>b</sup>, Louis-César Pasquier<sup>b</sup>

5    a.            Departamento de Química Orgánica e Inorgánica, Facultad de Química, Universidad de Oviedo, Av. Julián Clavería, 8,  
6    33006 Oviedo, Asturias, Spain

7    b.            Institut National de la Recherche Scientifique (Centre Eau, Terre et Environnement), Université du Québec, 490 rue de la  
8    Couronne, Québec G1K 9A9, Canada

9    \*Corresponding author. E-mail addresses : (J.F.Reynes) [fernandezreyjavier@uniovi.es](mailto:fernandezreyjavier@uniovi.es), [javier.reynes@hotmail.com](mailto:javier.reynes@hotmail.com)

10

11 **1. Materials and Methods**

12 **1.1 Synthesis**

13

14 **Table S1.** Buffer solution preparation and pH measured.

| Compound name                  | Buffer Solution                                                                                     | Theoretical Buffer Solution pH | pH measure | NaOH 0.1M added (ml) | HCl 0.1M added (ml) |
|--------------------------------|-----------------------------------------------------------------------------------------------------|--------------------------------|------------|----------------------|---------------------|
| Sodium Chloride                | 50 ml 0.2 M NaCl                                                                                    | 1                              | 1.01       | 0                    | 0                   |
| Hydrochlorid acid              | 134 ml 0.2 M HCl                                                                                    |                                |            |                      |                     |
| Sodium Chloride                | 51 ml 0.2 M NaCl                                                                                    | 2                              | 1.90       | 0                    | 0                   |
| Chlorhydric acid               | 13 ml 0.2 M HCl                                                                                     |                                |            |                      |                     |
| Potassium hydrogen phthalate   | 100 ml 0.1 M C <sub>8</sub> H <sub>5</sub> KO <sub>4</sub>                                          | 3                              | 3.05       | 0                    | 0                   |
| Hydrochlorid acid              | 44.6 ml 0.1 M HCl                                                                                   |                                |            |                      |                     |
| Acetic Acid                    | 164 ml 0.1 M CH <sub>3</sub> COOH                                                                   | 4                              | 3.90       | 0                    | 0                   |
| Sodium Acetate                 | 36 ml 0.1 M C <sub>2</sub> H <sub>3</sub> NaO <sub>2</sub>                                          |                                |            |                      |                     |
| Acetic Acid                    | 59 ml 0.1 M CH <sub>3</sub> COOH                                                                    | 5                              | 4.98       | 0                    | 0                   |
| Sodium Acetate                 | 141 ml 0.1 M C <sub>2</sub> H <sub>3</sub> NaO <sub>2</sub>                                         |                                |            |                      |                     |
| Potassium dihydrogen phosphate | 50 ml 0.2 M KH <sub>2</sub> PO <sub>4</sub>                                                         | 6                              | 6.00       | 7                    | 0                   |
| Sodium hydroxide               | 100 ml 0.2 M NaOH                                                                                   |                                |            |                      |                     |
| Potassium dihydrogen phosphate | 50 ml 0.2 M KH <sub>2</sub> PO <sub>4</sub>                                                         | 7                              | 7.01       | 19                   | 0                   |
| Sodium hydroxide               | 100 ml 0.2 M NaOH                                                                                   |                                |            |                      |                     |
| Potassium dihydrogen phosphate | 50 ml 0.2 M KH <sub>2</sub> PO <sub>4</sub>                                                         | 8                              | 8.00       | 28                   | 0                   |
| Sodium hydroxide               | 100 ml 0.2 M NaOH                                                                                   |                                |            |                      |                     |
| Borax                          | 100 ml 0.025 M Na <sub>2</sub> [B <sub>4</sub> O <sub>5</sub> (OH) <sub>4</sub> ]·8H <sub>2</sub> O | 9                              | 9.02       | 0                    | 16                  |
| Hydrochlorid acid              | 9.2 ml 0.1 M HCl                                                                                    |                                |            |                      |                     |
| Borax                          | 47 ml 0.025 M Na <sub>2</sub> [B <sub>4</sub> O <sub>5</sub> (OH) <sub>4</sub> ]·8H <sub>2</sub> O  | 10                             | 10.10      | 0                    | 0                   |
| Sodium hydroxide               | 250 ml 0.1 M NaOH                                                                                   |                                |            |                      |                     |
| Sodium hydrogen carbonate      | 34.2 ml 0.05 M NaHCO <sub>3</sub>                                                                   | 11                             | 11.04      | 0                    | 0                   |
| Sodium hydroxide               | 45.4 ml 0.2M NaOH                                                                                   |                                |            |                      |                     |
| Sodium hydrogen carbonate      | 100 ml 0.05 M NaHCO <sub>3</sub>                                                                    | 12                             | 12.02      | 0                    | 0                   |
| Sodium hydroxide               | 48.4 ml 0.2M NaOH                                                                                   |                                |            |                      |                     |

15

16

## 17 2. Results and Discussion

### 18 2.1 IR spectra of the $[\text{Fe}(\text{bipy})_3]^{2+}$ complex solution

19 IR spectroscopy analysis of the  $[\text{Fe}(\text{bipy})_3]^{2+}$  complex at its natural pH (3.27) and ambient temperature was  
20 performed in order to confirm the complex formation.

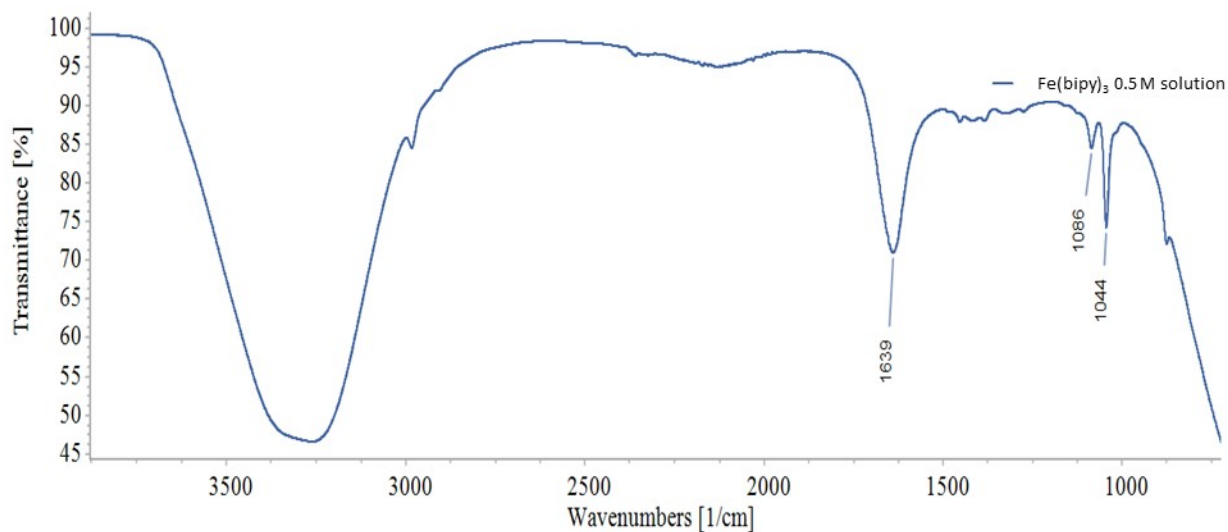

21

22 **Figure S1.** IR spectra of the  $[\text{Fe}(\text{bipy})_3]^{2+}$  complex solution (0.5 M) at its natural pH (3.27) and ambient temperature.

23

24

## 25 2.2 pH-dependent stability of $[\text{Fe}(\text{bipy})_3]^{2+}$

26 UV-VIS spectroscopy analysis of the  $[\text{Fe}(\text{bipy})_3]^{2+}$  complex at each pH were done to study its long-term stability  
27 after 7 days (Figure S2).

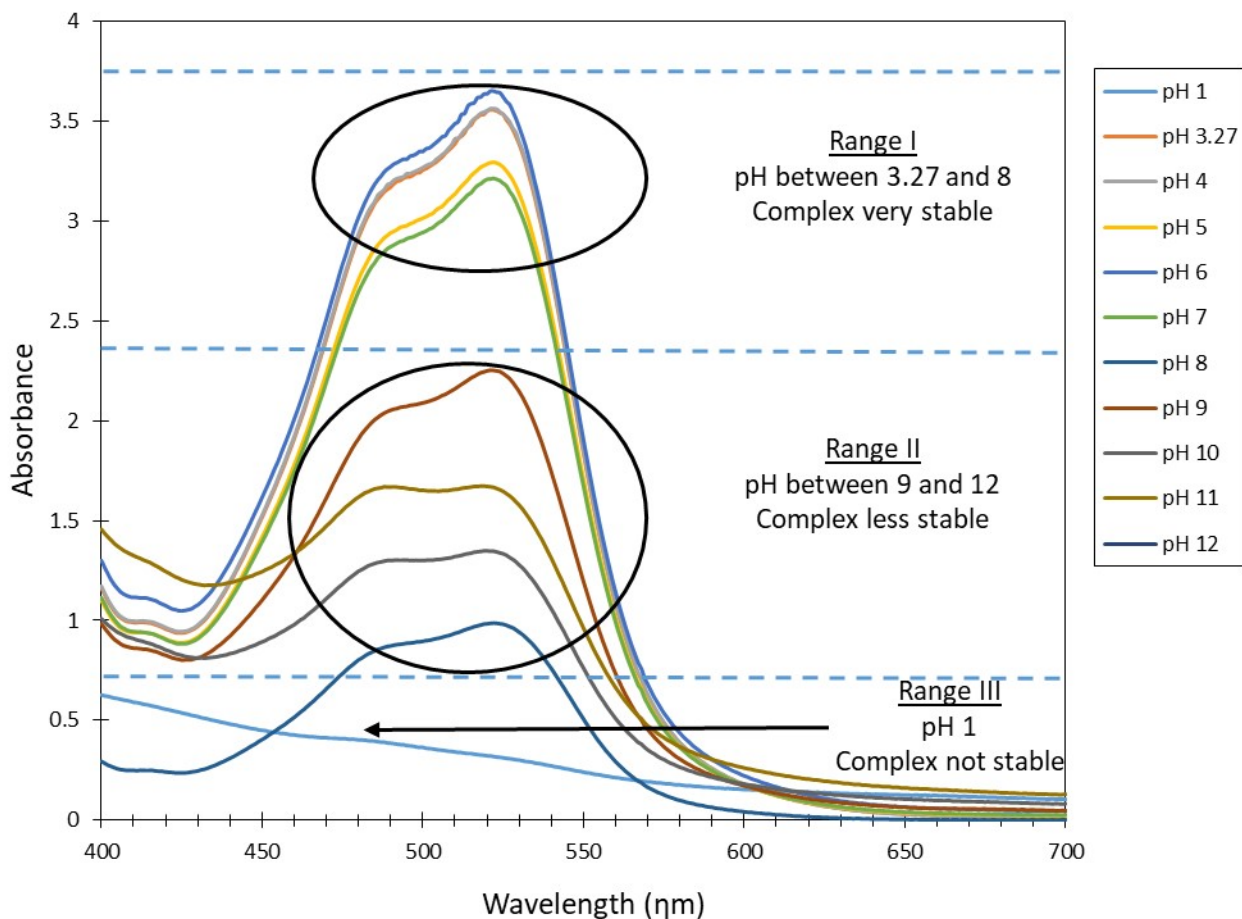

28

29 **Figure S2.** UV-Vis spectra (400–700 nm) of  $[\text{Fe}(\text{bipy})_3]^{2+}$  complex solution (0.015 M) at pH 1–12 on day 7.

30

31

32 **2.3 SEM Images and EDS analysis**

33 SEM-EDS analysis of the  $\text{FeCO}_3$  obtained at three different temperatures (21, 60 and 80 °C) were performed in  
34 order to study the particle morphology and composition (**Figure S3**)

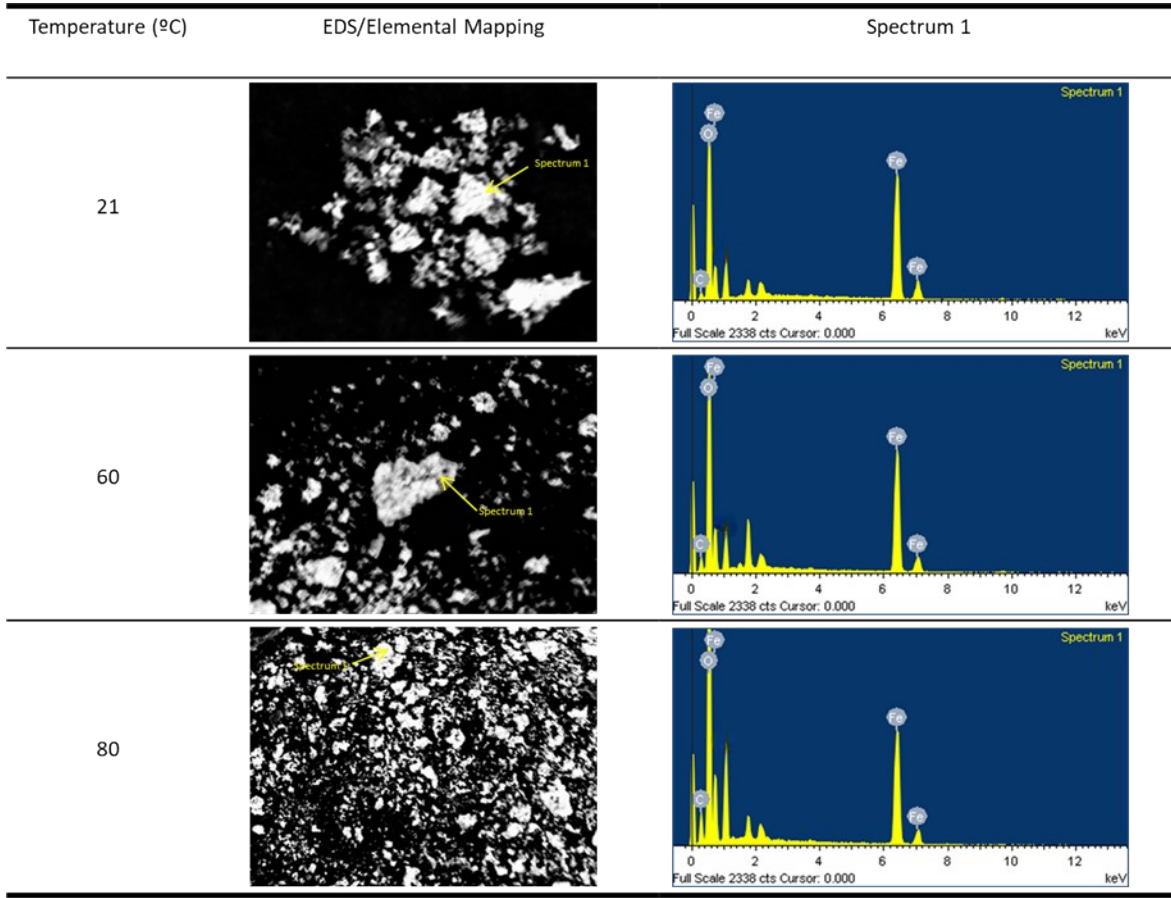

35

36 **Figure S3.** EDS elemental mapping analysis of samples prepared at 21, 60 and 80 °C, using a polished section of the  
37 solid precipitate formed in the carbonation reaction
